# Supplementary material
Source: PubMed Central journal article supplement (PMC4863879)
Supplement: EJI-46-455-s002.pdf [file EJI-46-455-s002.pdf]

# European Journal of Immunology

**Supporting Information**

**for**

**DOI 10.1002/eji.201545537**

Matthew J. Elder, Steven J. Webster, David L. Williams, J. S. Hill Gaston  
and Jane C. Goodall

**TSLP production by dendritic cells is modulated  
by IL-1 $\beta$  and components of the endoplasmic reticulum stress response**

**TSLP production by dendritic cells is modulated by  
IL-1 $\beta$  and components of the endoplasmic reticulum  
stress response**

**Supplementary Figures**

Matthew J. Elder, Steven J. Webster,  
David L. Williams, J. S. H. Gaston, Jane C. Goodall

## Supplemental figure 1

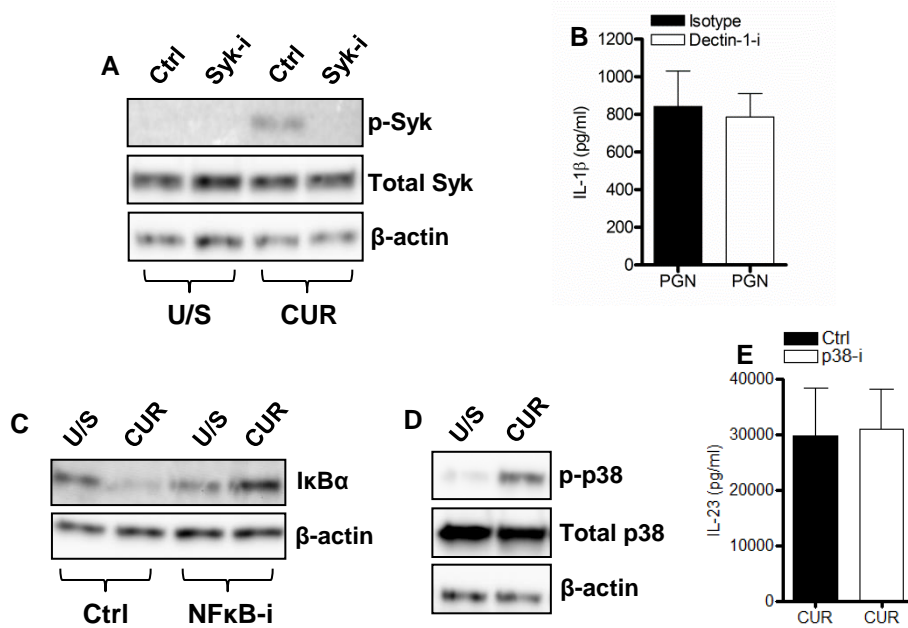

**Supplemental Figure 1.**  $\beta$ -glucan stimulated mDC induce Syk phosphorylation, I $\kappa$ B $\alpha$  degradation and p38 MAPK phosphorylation. (A) mDC were pre-incubated for one hour with or without the Syk inhibitor and were then stimulated with CUR for 4 hours. (B) mDC were pre-incubated for one hour with or without a dectin-1 neutralising antibody or isotype control and were then stimulated with peptidoglycan (PGN) for 24 hours (n=2). (C) mDC were pre-incubated for one hour with or without NF $\kappa$ B inhibitor and were then stimulated with CUR for 15 minutes and analysed for I $\kappa$ B $\alpha$  degradation. (D) mDC were stimulated with CUR for 4 hours and analysed for p38 MAPK phosphorylation. (E) mDC were pre-incubated for one hour with or without a p38 MAPK inhibitor and were then stimulated with CUR for 24 hours (n=3). I $\kappa$ B $\alpha$  degradation and Syk and p38 MAPK phosphorylation were measured by immunoblot. IL-1 $\beta$  and IL-23 were measured in 24 hour cell culture supernatants by ELISA. Cumulative data are shown as mean  $\pm$ SEM.

## Supplemental figure 2

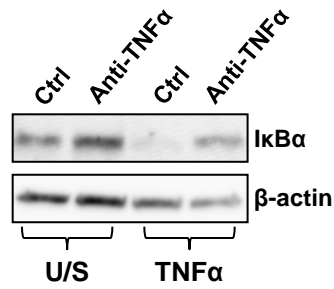

**Supplemental Figure 2.** Functionality of the anti-TNF $\alpha$  antibody utilised in this study is demonstrated by its ability to inhibit TNF $\alpha$  induced I $\kappa$ B $\alpha$  degradation. mDC were pre-incubated for one hour with or without anti-TNF $\alpha$  and were then stimulated with TNF $\alpha$  for 15 minutes. I $\kappa$ B $\alpha$  degradation was measured by immunoblot.

### Supplemental figure 3

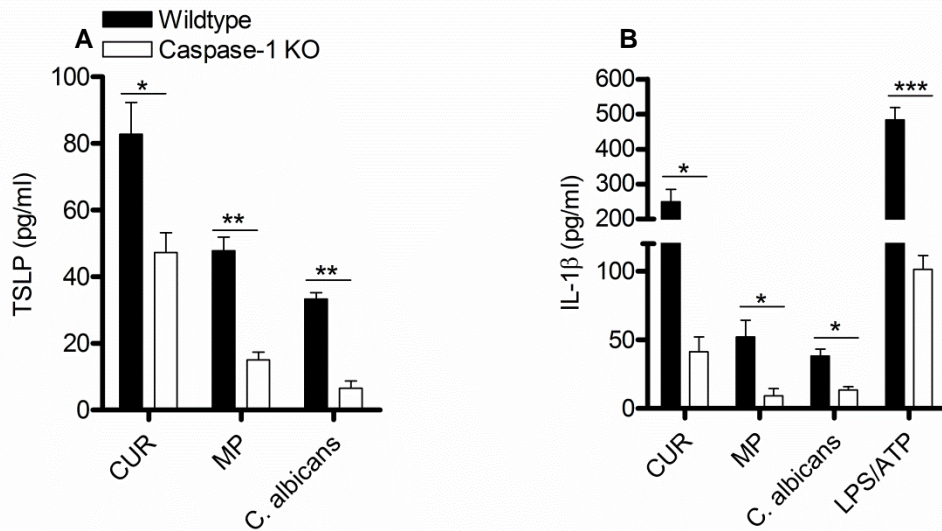

**Supplemental Figure 3.** Caspase-1 is required for dectin-1 induced TSLP and IL-1 $\beta$ . (A-B) BMDC from C57/B6 wild-type and caspase-1 KO mice were stimulated with CUR, MP, *C. albicans* or LPS/ATP for 24 hours (n=4). TSLP and IL-1 $\beta$  were measured in 24 hour cell culture supernatants by ELISA. Cumulative data are shown as mean  $\pm$ SEM. Statistical significance was calculated using t test. p values for TSLP production by CUR stimulated BMDC (\* p=0.0376), for MP stimulated BMDC (\*\* p=0.0047) and for *C. albicans* stimulated BMDC (\*\* p=0.0058). p values for IL-1 $\beta$  production by CUR stimulated BMDC (\* p=0.0188), for MP stimulated BMDC (\* p=0.0379), for *C. albicans* stimulated BMDC (\* p=0.0253) and for LPS/ATP stimulated BMDC (\*\*\*) p=0.0009).

# Supplemental figure 4

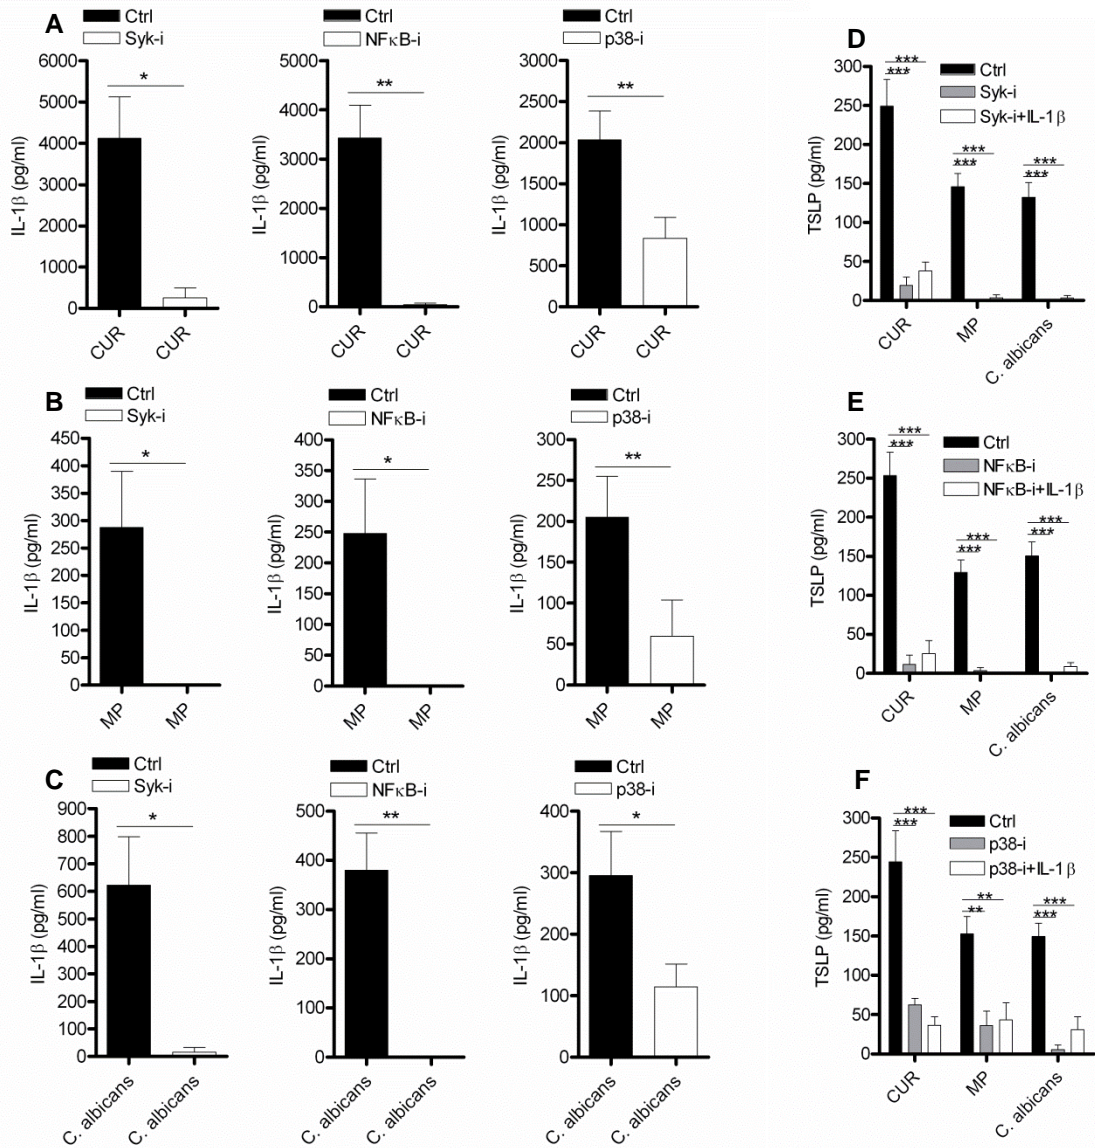

**Supplemental Figure 4.** Syk, NFκB and p38 MAPK are required for IL-1β and TSLP production. (A-C) mDC were pre-incubated for one hour with or without Syk inhibitor (n=5), NFκB inhibitor (n=5) or p38 MAPK inhibitor (n=7) and were then stimulated with CUR, MP or *C. albicans* for 24 hours. (D-F) mDC were pre-incubated for one hour with or without the Syk, NFκB or p38 MAPK inhibitors and were then stimulated with CUR, MP or *C. albicans* with or without recombinant IL-1β for 24 hours (n=3). TSLP and IL-1β were measured in 24 hour cell culture supernatants by ELISA. Cumulative data are shown as mean ±SEM. (A-C) Statistical significance calculated using t test. p values for IL-1β production by CUR stimulated mDC with Syk-i, NFκB-i and p38 MAPK-i respectively (\* p=0.0127, \*\* p=0.0072 and \*\* p=0.0016), for MP stimulated mDC (\* p=0.0491, \* p=0.0488 and \*\* p=0.0036) and for *C. albicans* stimulated mDC (\* p=0.0197, \*\* p=0.0073 and \* p=0.0146). (D-F) Statistical significance was calculated using two-way ANOVA with Bonferroni post-tests. (\*\*\*) p=0.001, \*\* p=0.01).

# Supplemental figure 5

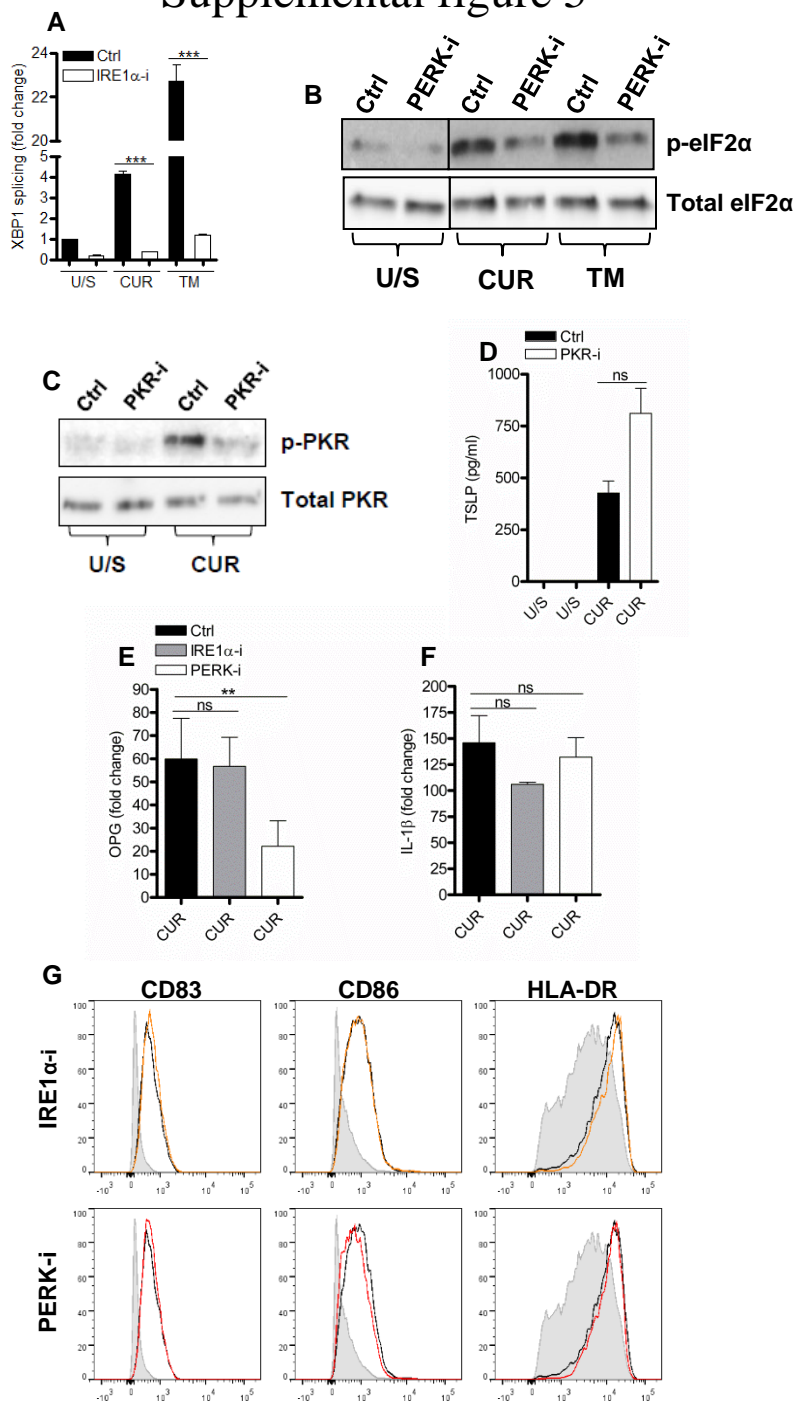

**Supplemental Figure 5.** Inhibitors of IRE1 $\alpha$  and PERK inhibit XBP1 splicing and eIF2 $\alpha$  phosphorylation respectively, but do not affect DC activation markers. (A-B) mDC were pre-incubated for one hour with or without IRE1 $\alpha$  or PERK inhibitors and were then stimulated with CUR or TM for 4 hours, and analysed for XBP1 splicing (n=3, representative experiment shown) and phospho eIF2 $\alpha$  (n=2, representative experiment shown) analysed as functional readouts for the efficacy of inhibitors. (C-D) mDC were pre-incubated for one hour with or without PKR inhibitor and were then stimulated with CUR for (C) 4 hours for PKR phosphorylation 4 hours or (D) 24 hours for TSLP secretion (n=2). (E-G) mDC were pre-incubated for 1 hour with or without IRE1 $\alpha$  or PERK inhibitors and were then stimulated with CUR for 4 hours analysed for OPG and IL-1 $\beta$  mRNA expression and for CD83, CD86 and HLA-DR surface expression by flow cytometry. Unstimulated control (grey filled profile), CUR stimulated (black line profile), CUR plus IRE1 $\alpha$  or PERK inhibitors (grey line profile). XBP1, OPG and IL-1 $\beta$  mRNA expression were measured by qRT-PCR. PKR phosphorylation was measured by immunoblot. TSLP was measured in 24 hour cell culture supernatants by ELISA. Cumulative data are shown as mean  $\pm$  SEM. Statistical significance calculated using one-way ANOVA with Bonferroni post-tests (ns = not significant, \*\*\* p=0.001, \*\* p=0.01, \* p=0.05).

## Supplemental figure 6

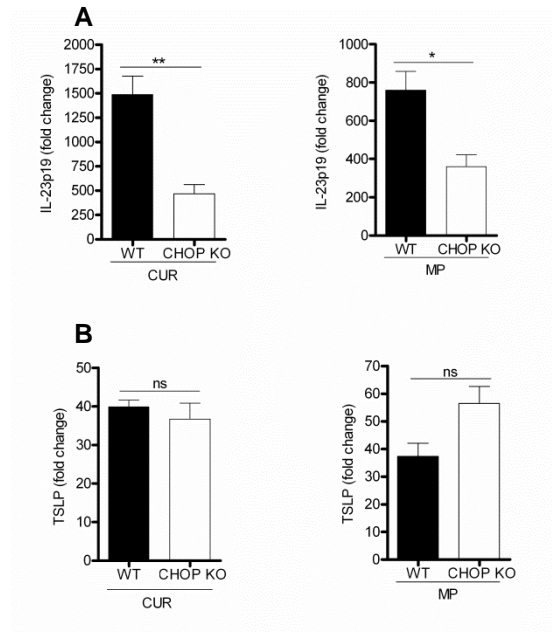

**Supplemental Figure 6.** The absence of CHOP does not affect dectin-1 induced TSLP expression. (A-B) BMDC from C57/B6 wild-type and CHOP KO mice were stimulated with CUR and MP for 4 hours (n=4). TSLP and IL-23p19 mRNA expression were measured by qRT-PCR. Cumulative data are shown as mean  $\pm$ SEM. Statistical significance was calculated using t test. p values for IL-23p19 expression by CUR stimulated BMDC (\*\* p=0.0029), and for MP stimulated BMDC (\* p=0.0143).
